# Supplementary material
Source: publisher figshare collection journal article supplement (https://gsajournals.figshare.com/ndownloader/files/27678711)
Supplement: Supplementary file 1 [file 27678711]

## Sheet: CA2 Stress Responses
Supplemental File S2
Stress response network meta-analysis for the CA2 dataset of the Brachypodium PM proteome
Bradi no.	Log2 Fold Change	Description	Predicted Functional Category	Stress Responses	Literature
Bradi1g03760.1	3.36755	Actin-Depolymerizing Factor 3-Like	Cell Structure	COLD	Danyluk, J., Carpentier, E., & Sarhan, F. (1996). Identification and characterization of a low temperature regulated gene encoding an actin-binding protein from wheat. FEBS letters, 389(3), 324-327.
Bradi1g03760.1	3.36755	Actin-Depolymerizing Factor 3-Like	Cell Structure	HEAT	Baisakh, N., & Subudhi, P. K. (2009). Heat stress alters the expression of salt stress induced genes in smooth cordgrass (Spartina alterniflora L.). Plant Physiology and Biochemistry, 47(3), 232-235.
Bradi1g03760.1	3.36755	Actin-Depolymerizing Factor 3-Like	Cell Structure	DROUGHT	Huang, Y. C., Huang, W. L., Hong, C. Y., Lur, H. S., & Chang, M. C. (2012). Comprehensive analysis of differentially expressed rice actin depolymerizing factor gene family and heterologous overexpression of OsADF3 confers Arabidopsis thaliana drought tolerance. Rice, 5(1), 33.
Bradi1g03760.1	3.36755	Actin-Depolymerizing Factor 3-Like	Cell Structure	OSMOTIC	Huang, Y. C., Huang, W. L., Hong, C. Y., Lur, H. S., & Chang, M. C. (2012). Comprehensive analysis of differentially expressed rice actin depolymerizing factor gene family and heterologous overexpression of OsADF3 confers Arabidopsis thaliana drought tolerance. Rice, 5(1), 33.
Bradi1g03760.1	3.36755	Actin-Depolymerizing Factor 3-Like	Cell Structure	ABA	Huang, Y. C., Huang, W. L., Hong, C. Y., Lur, H. S., & Chang, M. C. (2012). Comprehensive analysis of differentially expressed rice actin depolymerizing factor gene family and heterologous overexpression of OsADF3 confers Arabidopsis thaliana drought tolerance. Rice, 5(1), 33.
Bradi1g03760.1	3.36755	Actin-Depolymerizing Factor 3-Like	Cell Structure	PATHOGEN	Tian, M., Chaudhry, F., Ruzicka, D. R., Meagher, R. B., Staiger, C. J., & Day, B. (2009). Arabidopsis actin-depolymerizing factor AtADF4 mediates defense signal transduction triggered by the Pseudomonas syringae effector AvrPphB. Plant Physiology, 150(2), 815-824.
Bradi1g13232.1	1.1951	Glucan Endo-1,3-Beta-Glucosidase 8-Like	Cell Structure	PATHOGEN	Aggarwal, R., Purwar, S., Kharbikar, L., & Gupta, S. (2011). Induction of a wheat β-1, 3-glucanase gene during the defense response to Bipolaris sorokiniana. Acta Phytopathologica et Entomologica Hungarica, 46(1), 39-47.
Bradi1g13232.1	1.1951	Glucan Endo-1,3-Beta-Glucosidase 8-Like	Cell Structure	COLD	Ito, Y., Katsura, K., Maruyama, K., Taji, T., Kobayashi, M., Seki, M., ... & Yamaguchi-Shinozaki, K. (2006). Functional analysis of rice DREB1/CBF-type transcription factors involved in cold-responsive gene expression in transgenic rice. Plant and Cell Physiology, 47(1), 141-153.
Bradi3g14580.1	0.940453	Lamin-Like Protein-Like	Cell Structure	PATHOGEN	Guo, T., Mao, X., Zhang, H., Zhang, Y., Fu, M., Sun, Z., ... & Fang, Y. (2017). Lamin-like proteins negatively regulate plant immunity through NAC WITH TRANSMEMBRANE MOTIF1-LIKE9 and NONEXPRESSOR OF PR GENES1 in Arabidopsis thaliana. Molecular plant, 10(10), 1334-1348.
Bradi4g29770.1	-0.64877	Cinnamyl Alcohol Dehydrogenase 3	Cell Structure	WOUNDING	Cheng, H., Li, L., Xu, F., Cheng, S., Cao, F., Wang, Y., ... & Wu, C. (2013). Expression patterns of a cinnamyl alcohol dehydrogenase gene involved in lignin biosynthesis and environmental stress in Ginkgo biloba. Molecular biology reports, 40(1), 707-721.
Bradi4g29770.1	-0.64877	Cinnamyl Alcohol Dehydrogenase 3	Cell Structure	PATHOGEN	Lynch, D., Lidgett, A., McInnes, R., Huxley, H., Jones, E., Mahoney, N., & Spangenberg, G. (2002). Isolation and characterisation of three cinnamyl alcohol dehydrogenase homologue cDNAs from perennial ryegrass (Lolium perenne L.). Journal of Plant Physiology, 159(6), 653-660.
Bradi4g29770.1	-0.64877	Cinnamyl Alcohol Dehydrogenase 3	Cell Structure	ABA	Kim, Y. H., Bae, J. M., & Huh, G. H. (2010). Transcriptional regulation of the cinnamyl alcohol dehydrogenase gene from sweetpotato in response to plant developmental stage and environmental stress. Plant cell reports, 29(7), 779-791.
Bradi4g29770.1	-0.64877	Cinnamyl Alcohol Dehydrogenase 3	Cell Structure	COLD	Kim, Y. H., Bae, J. M., & Huh, G. H. (2010). Transcriptional regulation of the cinnamyl alcohol dehydrogenase gene from sweetpotato in response to plant developmental stage and environmental stress. Plant cell reports, 29(7), 779-791.
Bradi4g29770.1	-0.64877	Cinnamyl Alcohol Dehydrogenase 3	Cell Structure	SALT	Choi, B., Chung, J. Y., Bae, H. J., Bae, I., Park, S., & Bae, H. (2016). Functional characterization of cinnamyl alcohol dehydrogenase during developmental stages and under various stress conditions in kenaf (Hibiscus cannabinus L.). BioResources, 11(1), 105-125.
Bradi1g47140.1	1.21373	Phospholipid Hydroperoxide Glutathione Peroxidase 1, Chloroplastic-Like	Disease and Defence	OXIDATIVE	Li, W. J., Feng, H., Fan, J. H., Zhang, R. Q., Zhao, N. M., & Liu, J. Y. (2000). Molecular cloning and expression of a phospholipid hydroperoxide glutathione peroxidase homolog in Oryza sativa. Biochimica et Biophysica Acta (BBA)-Gene Structure and Expression, 1493(1-2), 225-230.
Bradi1g47140.1	1.21373	Phospholipid Hydroperoxide Glutathione Peroxidase 1, Chloroplastic-Like	Disease and Defence	PATHOGEN	Levine, A., Tenhaken, R., Dixon, R., & Lamb, C. (1994). H2O2 from the oxidative burst orchestrates the plant hypersensitive disease resistance response. Cell, 79(4), 583-593.
Bradi1g76330.1	0.773108	Catalase	Disease and Defence	OXIDATIVE	Mhamdi, A., Queval, G., Chaouch, S., Vanderauwera, S., Van Breusegem, F., & Noctor, G. (2010). Catalase function in plants: a focus on Arabidopsis mutants as stress-mimic models. Journal of experimental botany, 61(15), 4197-4220.
Bradi1g76330.1	0.773108	Catalase	Disease and Defence	ABA	Mhamdi, A., Queval, G., Chaouch, S., Vanderauwera, S., Van Breusegem, F., & Noctor, G. (2010). Catalase function in plants: a focus on Arabidopsis mutants as stress-mimic models. Journal of experimental botany, 61(15), 4197-4220.
Bradi1g76330.1	0.773108	Catalase	Disease and Defence	PATHOGEN	Takahashi, H., Chen, Z., Du, H., Liu, Y., & Klessig, D. F. (1997). Development of necrosis and activation of disease resistance in transgenic tobacco plants with severely reduced catalase levels. The Plant Journal, 11(5), 993-1005.
Bradi1g76330.1	0.773108	Catalase	Disease and Defence	METAL	Głowacka, K., Źróbek-Sokolnik, A., Okorski, A., & Najdzion, J. (2019). The effect of cadmium on the activity of stress-related enzymes and the ultrastructure of pea roots. Plants, 8(10), 413.
Bradi1g76330.1	0.773108	Catalase	Disease and Defence	LIGHT	Chamnongpol, S., Willekens, H., Langebartels, C., Van Montagu, M., Inzé, D., & Van Camp, W. (1996). Transgenic tobacco with a reduced catalase activity develops necrotic lesions and induces pathogenesis‐related expression under high light. The Plant Journal, 10(3), 491-503.
Bradi1g76330.1	0.773108	Catalase	Disease and Defence	SALT	Moriwaki, T., Yamamoto, Y., Aida, T., Funahashi, T., Shishido, T., Asada, M., ... & Motohashi, T. (2008). Overexpression of the Escherichia coli catalase gene, katE, enhances tolerance to salinity stress in the transgenic indica rice cultivar, BR5. Plant Biotechnology Reports, 2(1), 41-46.
Bradi1g76330.1	0.773108	Catalase	Disease and Defence	DROUGHT	Moriwaki, T., Yamamoto, Y., Aida, T., Funahashi, T., Shishido, T., Asada, M., ... & Motohashi, T. (2008). Overexpression of the Escherichia coli catalase gene, katE, enhances tolerance to salinity stress in the transgenic indica rice cultivar, BR5. Plant Biotechnology Reports, 2(1), 41-46.
Bradi1g76330.1	0.773108	Catalase	Disease and Defence	HEAT	Chiang, C. M., Chen, S. P., Chen, L. F. O., Chiang, M. C., Chien, H. L., & Lin, K. H. (2014). Expression of the broccoli catalase gene (BoCAT) enhances heat tolerance in transgenic Arabidopsis. Journal of plant biochemistry and biotechnology, 23(3), 266-277.
Bradi2g55920.1	0.843644	NDR1/HIN1-Like Protein 10	Disease and Defence	PATHOGEN	Zheng, M. S., Takahashi, H., Miyazaki, A., Hamamoto, H., Shah, J., Yamaguchi, I., & Kusano, T. (2004). Up-regulation of Arabidopsis thaliana NHL10 in the hypersensitive response to Cucumber mosaic virus infection and in senescing leaves is controlled by signalling pathways that differ in salicylate involvement. Planta, 218(5), 740-750.
Bradi2g59920.1	1.37533	Protein SRC2	Disease and Defence	OXIDATIVE	Kawarazaki, T., Kimura, S., Iizuka, A., Hanamata, S., Nibori, H., Michikawa, M., ... & Kuchitsu, K. (2013). A low temperature-inducible protein AtSRC2 enhances the ROS-producing activity of NADPH oxidase AtRbohF. Biochimica et Biophysica Acta (BBA)-Molecular Cell Research, 1833(12), 2775-2780.
Bradi2g59920.1	1.37533	Protein SRC2	Disease and Defence	COLD	Kawarazaki, T., Kimura, S., Iizuka, A., Hanamata, S., Nibori, H., Michikawa, M., ... & Kuchitsu, K. (2013). A low temperature-inducible protein AtSRC2 enhances the ROS-producing activity of NADPH oxidase AtRbohF. Biochimica et Biophysica Acta (BBA)-Molecular Cell Research, 1833(12), 2775-2780.
Bradi3g04270.1	2.21951	Heavy Metal-Associated Isoprenylated Plant Protein 20	Disease and Defence	METAL	de Abreu‐Neto, J. B., Turchetto‐Zolet, A. C., de Oliveira, L. F. V., Bodanese Zanettini, M. H., & Margis‐Pinheiro, M. (2013). Heavy metal‐associated isoprenylated plant protein (HIPP): characterization of a family of proteins exclusive to plants. The FEBS journal, 280(7), 1604-1616.
Bradi3g04270.1	2.21951	Heavy Metal-Associated Isoprenylated Plant Protein 20	Disease and Defence	PATHOGEN	de Abreu‐Neto, J. B., Turchetto‐Zolet, A. C., de Oliveira, L. F. V., Bodanese Zanettini, M. H., & Margis‐Pinheiro, M. (2013). Heavy metal‐associated isoprenylated plant protein (HIPP): characterization of a family of proteins exclusive to plants. The FEBS journal, 280(7), 1604-1616.
Bradi3g04270.1	2.21951	Heavy Metal-Associated Isoprenylated Plant Protein 20	Disease and Defence	DROUGHT	de Abreu‐Neto, J. B., Turchetto‐Zolet, A. C., de Oliveira, L. F. V., Bodanese Zanettini, M. H., & Margis‐Pinheiro, M. (2013). Heavy metal‐associated isoprenylated plant protein (HIPP): characterization of a family of proteins exclusive to plants. The FEBS journal, 280(7), 1604-1616.
Bradi3g04270.1	2.21951	Heavy Metal-Associated Isoprenylated Plant Protein 20	Disease and Defence	COLD	de Abreu‐Neto, J. B., Turchetto‐Zolet, A. C., de Oliveira, L. F. V., Bodanese Zanettini, M. H., & Margis‐Pinheiro, M. (2013). Heavy metal‐associated isoprenylated plant protein (HIPP): characterization of a family of proteins exclusive to plants. The FEBS journal, 280(7), 1604-1616.
Bradi3g45870.2	2.24103	Immune-Associated Nucleotide-Binding Protein 9	Disease and Defence	PATHOGEN	Wang, Y., Li, Y., Rosas-Diaz, T., Caceres-Moreno, C., Lozano-Duran, R., & Macho, A. P. (2019). The IMMUNE-ASSOCIATED NUCLEOTIDE-BINDING 9 protein is a regulator of basal immunity in Arabidopsis thaliana. Molecular Plant-Microbe Interactions, 32(1), 65-75.
Bradi3g48590.1	0.653941	Temperature-Induced Lipocalin 1	Disease and Defence	COLD	Charron, J. B. F., Ouellet, F., Houde, M., & Sarhan, F. (2008). The plant Apolipoprotein D ortholog protects Arabidopsis against oxidative stress. BMC plant biology, 8(1), 86.
Bradi3g48590.1	0.653941	Temperature-Induced Lipocalin 1	Disease and Defence	OXIDATIVE	Charron, J. B. F., Ouellet, F., Houde, M., & Sarhan, F. (2008). The plant Apolipoprotein D ortholog protects Arabidopsis against oxidative stress. BMC plant biology, 8(1), 86.
Bradi3g48590.1	0.653941	Temperature-Induced Lipocalin 1	Disease and Defence	HEAT	CHI, W. T., FUNG, R. W., LIU, H. C., HSU, C. C., & CHARNG, Y. Y. (2009). Temperature‐induced lipocalin is required for basal and acquired thermotolerance in Arabidopsis. Plant, cell & environment, 32(7), 917-927.
Bradi3g48590.1	0.653941	Temperature-Induced Lipocalin 1	Disease and Defence	LIGHT	Charron, J. B. F., Ouellet, F., Houde, M., & Sarhan, F. (2008). The plant Apolipoprotein D ortholog protects Arabidopsis against oxidative stress. BMC plant biology, 8(1), 86.
Bradi3g48590.1	0.653941	Temperature-Induced Lipocalin 1	Disease and Defence	SALT	Abo-Ogiala, A., Carsjens, C., Diekmann, H., Fayyaz, P., Herrfurth, C., Feussner, I., & Polle, A. (2014). Temperature-induced lipocalin (TIL) is translocated under salt stress and protects chloroplasts from ion toxicity. Journal of plant physiology, 171(3-4), 250-259.
Bradi3g48590.1	0.653941	Temperature-Induced Lipocalin 1	Disease and Defence	DROUGHT	Rizhsky, L., Liang, H., Shuman, J., Shulaev, V., Davletova, S., & Mittler, R. (2004). When defense pathways collide. The response of Arabidopsis to a combination of drought and heat stress. Plant physiology, 134(4), 1683-1696.
Bradi3g51200.1	8.91493	Dehydrin COR410-Like	Disease and Defence	COLD	Kosová, K., Vítámvás, P., & Prášil, I. T. (2014). Wheat and barley dehydrins under cold, drought, and salinity–what can LEA-II proteins tell us about plant stress response?. Frontiers in plant science, 5, 343.
Bradi3g51200.1	8.91493	Dehydrin COR410-Like	Disease and Defence	DROUGHT	Kosová, K., Vítámvás, P., & Prášil, I. T. (2014). Wheat and barley dehydrins under cold, drought, and salinity–what can LEA-II proteins tell us about plant stress response?. Frontiers in plant science, 5, 343.
Bradi3g51200.1	8.91493	Dehydrin COR410-Like	Disease and Defence	ABA	Kosová, K., Vítámvás, P., & Prášil, I. T. (2014). Wheat and barley dehydrins under cold, drought, and salinity–what can LEA-II proteins tell us about plant stress response?. Frontiers in plant science, 5, 343.
Bradi5g04560.1	2.49026	Heavy Metal-Associated Isoprenylated Plant Protein 27	Disease and Defence	METAL	de Abreu‐Neto, J. B., Turchetto‐Zolet, A. C., de Oliveira, L. F. V., Bodanese Zanettini, M. H., & Margis‐Pinheiro, M. (2013). Heavy metal‐associated isoprenylated plant protein (HIPP): characterization of a family of proteins exclusive to plants. The FEBS journal, 280(7), 1604-1616.
Bradi5g04560.1	2.49026	Heavy Metal-Associated Isoprenylated Plant Protein 27	Disease and Defence	PATHOGEN	de Abreu‐Neto, J. B., Turchetto‐Zolet, A. C., de Oliveira, L. F. V., Bodanese Zanettini, M. H., & Margis‐Pinheiro, M. (2013). Heavy metal‐associated isoprenylated plant protein (HIPP): characterization of a family of proteins exclusive to plants. The FEBS journal, 280(7), 1604-1616.
Bradi5g04560.1	2.49026	Heavy Metal-Associated Isoprenylated Plant Protein 27	Disease and Defence	DROUGHT	de Abreu‐Neto, J. B., Turchetto‐Zolet, A. C., de Oliveira, L. F. V., Bodanese Zanettini, M. H., & Margis‐Pinheiro, M. (2013). Heavy metal‐associated isoprenylated plant protein (HIPP): characterization of a family of proteins exclusive to plants. The FEBS journal, 280(7), 1604-1616.
Bradi5g04560.1	2.49026	Heavy Metal-Associated Isoprenylated Plant Protein 27	Disease and Defence	COLD	de Abreu‐Neto, J. B., Turchetto‐Zolet, A. C., de Oliveira, L. F. V., Bodanese Zanettini, M. H., & Margis‐Pinheiro, M. (2013). Heavy metal‐associated isoprenylated plant protein (HIPP): characterization of a family of proteins exclusive to plants. The FEBS journal, 280(7), 1604-1616.
Bradi5g10570.1	1.11729	Glutathione S-Transferase F10-Like	Disease and Defence	OXIDATIVE	Gullner, G., Komives, T., Király, L., & Schröder, P. (2018). Glutathione S-transferase enzymes in plant-pathogen interactions. Frontiers in plant science, 9, 1836.
Bradi5g10570.1	2.11729	Glutathione S-Transferase F10-Like	Disease and Defence	PATHOGEN	Gullner, G., Komives, T., Király, L., & Schröder, P. (2018). Glutathione S-transferase enzymes in plant-pathogen interactions. Frontiers in plant science, 9, 1836.
Bradi5g10860.1	2.12234	Dehydrin COR410-Like	Disease and Defence	COLD	Kosová, K., Vítámvás, P., & Prášil, I. T. (2014). Wheat and barley dehydrins under cold, drought, and salinity–what can LEA-II proteins tell us about plant stress response?. Frontiers in plant science, 5, 343.
Bradi5g10860.1	2.12234	Dehydrin COR410-Like	Disease and Defence	DROUGHT	Kosová, K., Vítámvás, P., & Prášil, I. T. (2014). Wheat and barley dehydrins under cold, drought, and salinity–what can LEA-II proteins tell us about plant stress response?. Frontiers in plant science, 5, 343.
Bradi5g10860.1	2.12234	Dehydrin COR410-Like	Disease and Defence	ABA	Kosová, K., Vítámvás, P., & Prášil, I. T. (2014). Wheat and barley dehydrins under cold, drought, and salinity–what can LEA-II proteins tell us about plant stress response?. Frontiers in plant science, 5, 343.
Bradi5g26610.1	0.589823	NDR1/HIN1-Like Protein 2	Disease and Defence	PATHOGEN	Varet, A., Parker, J., Tornero, P., Nass, N., Nürnberger, T., Dangl, J. L., ... & Lee, J. (2002). NHL25 and NHL3, two NDR1/HIN1-like genes in Arabidopsis thaliana with potential role (s) in plant defense. Molecular plant-microbe interactions, 15(6), 608-616.
Bradi1g23520.1	-0.618165	Probable Nucleoredoxin 1-2	Disease and Defence	OXIDATIVE	Kneeshaw, S., Keyani, R., Delorme-Hinoux, V., Imrie, L., Loake, G. J., Le Bihan, T., ... & Spoel, S. H. (2017). Nucleoredoxin guards against oxidative stress by protecting antioxidant enzymes. Proceedings of the National Academy of Sciences, 114(31), 8414-8419.
Bradi1g30130.1	-0.988473	Heat Shock Protein 90	Disease and Defence	PATHOGEN	Takahashi, A., Casais, C., Ichimura, K., & Shirasu, K. (2003). HSP90 interacts with RAR1 and SGT1 and is essential for RPS2-mediated disease resistance in Arabidopsis. Proceedings of the National Academy of Sciences, 100(20), 11777-11782.
Bradi1g30130.1	-0.988473	Heat Shock Protein 90	Disease and Defence	OXIDATIVE	Tichá, T., Samakovli, D., Kuchařová, A., Vavrdová, T., & Šamaj, J. (2020). Multifaceted roles of HEAT SHOCK PROTEIN 90 molecular chaperones in plant development. Journal of Experimental Botany.
Bradi1g30130.1	-0.988473	Heat Shock Protein 90	Disease and Defence	SALT	Tichá, T., Samakovli, D., Kuchařová, A., Vavrdová, T., & Šamaj, J. (2020). Multifaceted roles of HEAT SHOCK PROTEIN 90 molecular chaperones in plant development. Journal of Experimental Botany.
Bradi1g30130.1	-0.988473	Heat Shock Protein 90	Disease and Defence	DROUGHT	Tichá, T., Samakovli, D., Kuchařová, A., Vavrdová, T., & Šamaj, J. (2020). Multifaceted roles of HEAT SHOCK PROTEIN 90 molecular chaperones in plant development. Journal of Experimental Botany.
Bradi1g30130.1	-0.988473	Heat Shock Protein 90	Disease and Defence	OSMOTIC	Tichá, T., Samakovli, D., Kuchařová, A., Vavrdová, T., & Šamaj, J. (2020). Multifaceted roles of HEAT SHOCK PROTEIN 90 molecular chaperones in plant development. Journal of Experimental Botany.
Bradi1g30130.1	-0.988473	Heat Shock Protein 90	Disease and Defence	COLD	Krishna, P., Sacco, M., Cherutti, J. F., & Hill, S. (1995). Cold-induced accumulation of hsp90 transcripts in Brassica napus. Plant Physiology, 107(3), 915-923.
Bradi1g56910.1	-0.702154	Probable Carboxylesterase 15	Disease and Defence	PATHOGEN	Ko, M., Cho, J. H., Seo, H. H., Lee, H. H., Kang, H. Y., Nguyen, T. S., ... & Kim, J. I. (2016). Constitutive expression of a fungus-inducible carboxylesterase improves disease resistance in transgenic pepper plants. Planta, 244(2), 379-392.
Bradi1g56910.1	-0.702154	Probable Carboxylesterase 15	Disease and Defence	OSMOTIC	Behringer, D., Zimmermann, H., Ziegenhagen, B., & Liepelt, S. (2015). Differential gene expression reveals candidate genes for drought stress response in Abies alba (Pinaceae). PLoS One, 10(4), e0124564.
Bradi1g67840.1	-1.81052	Probabale Disease Resistance Protein At1G61300	Disease and Defence	PATHOGEN	Nepal, M. P., Andersen, E. J., Neupane, S., & Benson, B. V. (2017). Comparative genomics of non-TNL disease resistance genes from six plant species. Genes, 8(10), 249.
Bradi2g30560.1	-1.7713	Heat Shock Protein 70	Disease and Defence	HEAT	Scarpeci, T. E., Zanor, M. I., & Valle, E. M. (2008). Investigating the role of plant heat shock proteins during oxidative stress. Plant signaling & behavior, 3(10), 856-857.
Bradi2g30560.1	-1.7713	Heat Shock Protein 70	Disease and Defence	LIGHT	Scarpeci, T. E., Zanor, M. I., & Valle, E. M. (2008). Investigating the role of plant heat shock proteins during oxidative stress. Plant signaling & behavior, 3(10), 856-857.
Bradi2g30560.1	-1.7713	Heat Shock Protein 70	Disease and Defence	OXIDATIVE	Scarpeci, T. E., Zanor, M. I., & Valle, E. M. (2008). Investigating the role of plant heat shock proteins during oxidative stress. Plant signaling & behavior, 3(10), 856-857.
Bradi2g30560.1	-1.7713	Heat Shock Protein 70	Disease and Defence	COLD	Jiang, C., Bi, Y., Zhang, R., & Feng, S. (2020). Expression of RcHSP70, heat shock protein 70 gene from Chinese rose, enhances host resistance to abiotic stresses. Scientific Reports, 10(1), 1-10.
Bradi2g44030.1	-0.754677	Protein SGT1 Homolog	Disease and Defence	PATHOGEN	Azevedo, C., Betsuyaku, S., Peart, J., Takahashi, A., Noel, L., Sadanandom, A., ... & Shirasu, K. (2006). Role of SGT1 in resistance protein accumulation in plant immunity. The EMBO Journal, 25(9), 2007-2016.
Bradi3g17680.1	-0.629503	OBG-Like ATPase	Disease and Defence	PATHOGEN	Cheung, M. Y., Li, X., Miao, R., Fong, Y. H., Li, K. P., Yung, Y. L., ... & Lam, H. M. (2016). ATP binding by the P-loop NTPase OsYchF1 (an unconventional G protein) contributes to biotic but not abiotic stress responses. Proceedings of the National Academy of Sciences, 113(10), 2648-2653.
Bradi3g17680.1	-0.629503	OBG-Like ATPase	Disease and Defence	SALT	CHEUNG, M. Y., LI, M. W., YUNG, Y. L., WEN, C. Q., & LAM, H. M. (2013). The unconventional P‐loop NTPase OsYchF1 and its regulator OsGAP1 play opposite roles in salinity stress tolerance. Plant, cell & environment, 36(11), 2008-2020.
Bradi3g17680.1	-0.629503	OBG-Like ATPase	Disease and Defence	METAL	Sarry, J. E., Kuhn, L., Ducruix, C., Lafaye, A., Junot, C., Hugouvieux, V., ... & Amekraz, B. (2006). The early responses of Arabidopsis thaliana cells to cadmium exposure explored by protein and metabolite profiling analyses. Proteomics, 6(7), 2180-2198.
Bradi3g58240.1	-0.881595	Universal Stress Protein Phos32	Disease and Defence	PATHOGEN	Lenman, M., Sörensson, C., & Andreasson, E. (2008). Enrichment of phosphoproteins and phosphopeptide derivatization identify universal stress proteins in elicitor-treated Arabidopsis. Molecular plant-microbe interactions, 21(10), 1275-1284.
Bradi4g25120.1	-0.763531	NDR1/HIN1-Like Protein 1	Disease and Defence	PATHOGEN	Ascencio-Ibáñez, J. T., Sozzani, R., Lee, T. J., Chu, T. M., Wolfinger, R. D., Cella, R., & Hanley-Bowdoin, L. (2008). Global analysis of Arabidopsis gene expression uncovers a complex array of changes impacting pathogen response and cell cycle during geminivirus infection. Plant physiology, 148(1), 436-454.
Bradi4g25120.1	-0.763531	NDR1/HIN1-Like Protein 1	Disease and Defence	ABA	Bao, Y., Song, W. M., & Zhang, H. X. (2016). Role of Arabidopsis NHL family in ABA and stress response. Plant signaling & behavior, 11(5), e1180493.
Bradi3g18220.1	0.772656	Glucan Endo-1,3-Beta-Glucosidase 5-Like	Disease and Defence, Cell Structure	PATHOGEN	Aggarwal, R., Purwar, S., Kharbikar, L., & Gupta, S. (2011). Induction of a wheat β-1, 3-glucanase gene during the defense response to Bipolaris sorokiniana. Acta Phytopathologica et Entomologica Hungarica, 46(1), 39-47.
Bradi3g18220.1	0.772656	Glucan Endo-1,3-Beta-Glucosidase 5-Like	Disease and Defence, Cell Structure	COLD	Ito, Y., Katsura, K., Maruyama, K., Taji, T., Kobayashi, M., Seki, M., ... & Yamaguchi-Shinozaki, K. (2006). Functional analysis of rice DREB1/CBF-type transcription factors involved in cold-responsive gene expression in transgenic rice. Plant and Cell Physiology, 47(1), 141-153.
Bradi3g39620.1	-0.985405	Heat Shock Protein 81-1 (HSP90)	Disease and Defence, Protein Destination And Storage	HEAT	Yamada, K., & Nishimura, M. (2007, June). HSP90 regulates heat shock response that is responsible for heat adaptation. In 18th International Conference on Arabidopsis Research (第十八届国际拟南芥大会) (pp. 178-178). 中国科学院.
Bradi3g39620.1	-0.985405	Heat Shock Protein 81-1 (HSP90)	Disease and Defence, Protein Destination And Storage	PATHOGEN	Takahashi, A., Casais, C., Ichimura, K., & Shirasu, K. (2003). HSP90 interacts with RAR1 and SGT1 and is essential for RPS2-mediated disease resistance in Arabidopsis. Proceedings of the National Academy of Sciences, 100(20), 11777-11782.
Bradi4g08430.1	-2.24859	Polyadenylate-Binding Protein, Pabp	Disease and Defence, Protein Synthesis	PATHOGEN	Smith, R. W., & Gray, N. K. (2010). Poly (A)-binding protein (PABP): a common viral target. Biochemical Journal, 426(1), 1-12.
Bradi4g38860.1	-0.691397	Protein SRC2	Disease and Defence, Signal Transduction	OXIDATIVE	Kawarazaki, T., Kimura, S., Iizuka, A., Hanamata, S., Nibori, H., Michikawa, M., ... & Kuchitsu, K. (2013). A low temperature-inducible protein AtSRC2 enhances the ROS-producing activity of NADPH oxidase AtRbohF. Biochimica et Biophysica Acta (BBA)-Molecular Cell Research, 1833(12), 2775-2780.
Bradi4g38860.1	-0.691397	Protein SRC2	Disease and Defence, Signal Transduction	COLD	Kawarazaki, T., Kimura, S., Iizuka, A., Hanamata, S., Nibori, H., Michikawa, M., ... & Kuchitsu, K. (2013). A low temperature-inducible protein AtSRC2 enhances the ROS-producing activity of NADPH oxidase AtRbohF. Biochimica et Biophysica Acta (BBA)-Molecular Cell Research, 1833(12), 2775-2780.
Bradi1g70700.1	3.16053	Heavy Metal-Associated Isoprenylated Plant Protein 27	Disease and Defence, Signal Transduction	METAL	de Abreu‐Neto, J. B., Turchetto‐Zolet, A. C., de Oliveira, L. F. V., Bodanese Zanettini, M. H., & Margis‐Pinheiro, M. (2013). Heavy metal‐associated isoprenylated plant protein (HIPP): characterization of a family of proteins exclusive to plants. The FEBS journal, 280(7), 1604-1616.
Bradi1g70700.1	3.16053	Heavy Metal-Associated Isoprenylated Plant Protein 27	Disease and Defence, Signal Transduction	PATHOGEN	de Abreu‐Neto, J. B., Turchetto‐Zolet, A. C., de Oliveira, L. F. V., Bodanese Zanettini, M. H., & Margis‐Pinheiro, M. (2013). Heavy metal‐associated isoprenylated plant protein (HIPP): characterization of a family of proteins exclusive to plants. The FEBS journal, 280(7), 1604-1616.
Bradi1g70700.1	3.16053	Heavy Metal-Associated Isoprenylated Plant Protein 27	Disease and Defence, Signal Transduction	DROUGHT	de Abreu‐Neto, J. B., Turchetto‐Zolet, A. C., de Oliveira, L. F. V., Bodanese Zanettini, M. H., & Margis‐Pinheiro, M. (2013). Heavy metal‐associated isoprenylated plant protein (HIPP): characterization of a family of proteins exclusive to plants. The FEBS journal, 280(7), 1604-1616.
Bradi1g70700.1	3.16053	Heavy Metal-Associated Isoprenylated Plant Protein 27	Disease and Defence, Signal Transduction	COLD	de Abreu‐Neto, J. B., Turchetto‐Zolet, A. C., de Oliveira, L. F. V., Bodanese Zanettini, M. H., & Margis‐Pinheiro, M. (2013). Heavy metal‐associated isoprenylated plant protein (HIPP): characterization of a family of proteins exclusive to plants. The FEBS journal, 280(7), 1604-1616.
Bradi4g21890.1	-1.89823	Disease Resistance Protein Rpm1	Disease and Defence, Signal Transduction	PATHOGEN	Boyes, D. C., Nam, J., & Dangl, J. L. (1998). The Arabidopsis thaliana RPM1 disease resistance gene product is a peripheral plasma membrane protein that is degraded coincident with the hypersensitive response. Proceedings of the National Academy of Sciences, 95(26), 15849-15854.
Bradi1g76020.1	0.720141	24-Methylenesterol C-Methyltransferase 2-Like	Energy and Metabolism	COLD	Fan, H., Li, K., Yao, F., Sun, L., & Liu, Y. (2019). Comparative transcriptome analyses on terpenoids metabolism in field-and mountain-cultivated ginseng roots. BMC plant biology, 19(1), 82.
Bradi3g34980.1	1.03749	Quinone Oxidoreductase-Like Protein At1G23740, Chloroplastic-Like	Energy and Metabolism	OXIDATIVE	Yamauchi, Y., Hasegawa, A., Mizutani, M., & Sugimoto, Y. (2012). Chloroplastic NADPH-dependent alkenal/one oxidoreductase contributes to the detoxification of reactive carbonyls produced under oxidative stress. FEBS letters, 586(8), 1208-1213.
Bradi3g39750.1	0.702512	Serine--Glyoxylate Aminotransferase	Energy and Metabolism	PATHOGEN	Roos, J., Bejai, S., Oide, S., & Dixelius, C. (2014). RabGAP22 is required for defense to the vascular pathogen Verticillium longisporum and contributes to stomata immunity. PloS one, 9(2), e88187.
Bradi3g39750.1	0.702512	Serine--Glyoxylate Aminotransferase	Energy and Metabolism	ABA	Wang, R., Yang, L., Han, X., Zhao, Y., Zhao, L., Xiang, B., ... & Wang, Y. (2019). Overexpression of AtAGT1 promoted root growth and development during seedling establishment. Plant cell reports, 38(9), 1165-1180.
Bradi3g39750.1	0.702512	Serine--Glyoxylate Aminotransferase	Energy and Metabolism	SALT	Wang, R., Yang, L., Han, X., Zhao, Y., Zhao, L., Xiang, B., ... & Wang, Y. (2019). Overexpression of AtAGT1 promoted root growth and development during seedling establishment. Plant cell reports, 38(9), 1165-1180.
Bradi1g11670.1	-0.956739	Lipoxygenase	Energy and Metabolism	COLD	Babenko, L. M., Shcherbatiuk, M. M., Skaterna, T. D., & Kosakivska, I. V. (2017). Lipoxygenases and their metabolites in formation of plant stress tolerance. Ukrainian biochemical journal, 89(1), 5.
Bradi1g11670.1	-0.956739	Lipoxygenase	Energy and Metabolism	HEAT	Babenko, L. M., Shcherbatiuk, M. M., Skaterna, T. D., & Kosakivska, I. V. (2017). Lipoxygenases and their metabolites in formation of plant stress tolerance. Ukrainian biochemical journal, 89(1), 5.
Bradi1g11670.1	-0.956739	Lipoxygenase	Energy and Metabolism	WOUNDING	Babenko, L. M., Shcherbatiuk, M. M., Skaterna, T. D., & Kosakivska, I. V. (2017). Lipoxygenases and their metabolites in formation of plant stress tolerance. Ukrainian biochemical journal, 89(1), 5.
Bradi1g11670.1	-0.956739	Lipoxygenase	Energy and Metabolism	PATHOGEN	Babenko, L. M., Shcherbatiuk, M. M., Skaterna, T. D., & Kosakivska, I. V. (2017). Lipoxygenases and their metabolites in formation of plant stress tolerance. Ukrainian biochemical journal, 89(1), 5.
Bradi1g11680.1	-0.610164	Lipoxygenase	Energy and Metabolism	COLD	Babenko, L. M., Shcherbatiuk, M. M., Skaterna, T. D., & Kosakivska, I. V. (2017). Lipoxygenases and their metabolites in formation of plant stress tolerance. Ukrainian biochemical journal, 89(1), 5.
Bradi1g11680.1	-0.610164	Lipoxygenase	Energy and Metabolism	HEAT	Babenko, L. M., Shcherbatiuk, M. M., Skaterna, T. D., & Kosakivska, I. V. (2017). Lipoxygenases and their metabolites in formation of plant stress tolerance. Ukrainian biochemical journal, 89(1), 5.
Bradi1g11680.1	-0.610164	Lipoxygenase	Energy and Metabolism	WOUNDING	Babenko, L. M., Shcherbatiuk, M. M., Skaterna, T. D., & Kosakivska, I. V. (2017). Lipoxygenases and their metabolites in formation of plant stress tolerance. Ukrainian biochemical journal, 89(1), 5.
Bradi1g11680.1	-0.610164	Lipoxygenase	Energy and Metabolism	PATHOGEN	Babenko, L. M., Shcherbatiuk, M. M., Skaterna, T. D., & Kosakivska, I. V. (2017). Lipoxygenases and their metabolites in formation of plant stress tolerance. Ukrainian biochemical journal, 89(1), 5.
Bradi1g25790.1	-0.799445	Glycerol-3-Phosphate Acyltransferase 9	Energy and Metabolism	COLD	Li, X., Liu, P., Yang, P., Fan, C., & Sun, X. (2018). Characterization of the glycerol-3-phosphate acyltransferase gene and its real-time expression under cold stress in Paeonia lactiflora Pall. PloS one, 13(8), e0202168.
Bradi1g25790.1	-0.799445	Glycerol-3-Phosphate Acyltransferase 9	Energy and Metabolism	SALT	Sui, N., Tian, S., Wang, W., Wang, M., & Fan, H. (2017). Overexpression of glycerol-3-phosphate acyltransferase from Suaeda salsa improves salt tolerance in Arabidopsis. Frontiers in Plant Science, 8, 1337.
Bradi1g26770.1	-0.897498	Udp-Glycosyltransferase 71C4-Like	Energy and Metabolism	COLD	Li, P., Li, Y. J., Zhang, F. J., Zhang, G. Z., Jiang, X. Y., Yu, H. M., & Hou, B. K. (2017). The Arabidopsis UDP‐glycosyltransferases UGT79B2 and UGT79B3, contribute to cold, salt and drought stress tolerance via modulating anthocyanin accumulation. The Plant Journal, 89(1), 85-103.
Bradi1g26770.1	-0.897498	Udp-Glycosyltransferase 71C4-Like	Energy and Metabolism	SALT	Li, P., Li, Y. J., Zhang, F. J., Zhang, G. Z., Jiang, X. Y., Yu, H. M., & Hou, B. K. (2017). The Arabidopsis UDP‐glycosyltransferases UGT79B2 and UGT79B3, contribute to cold, salt and drought stress tolerance via modulating anthocyanin accumulation. The Plant Journal, 89(1), 85-103.
Bradi1g26770.1	-0.897498	Udp-Glycosyltransferase 71C4-Like	Energy and Metabolism	DROUGHT	Li, P., Li, Y. J., Zhang, F. J., Zhang, G. Z., Jiang, X. Y., Yu, H. M., & Hou, B. K. (2017). The Arabidopsis UDP‐glycosyltransferases UGT79B2 and UGT79B3, contribute to cold, salt and drought stress tolerance via modulating anthocyanin accumulation. The Plant Journal, 89(1), 85-103.
Bradi1g44460.1	-0.831486	Pyrophosphate--Fructose 6-Phosphate 1-Phosphotrasferase Subunit Beta	Energy and Metabolism	SALT	Lim, H., Cho, M. H., Bhoo, S. H., & Hahn, T. R. (2014). Pyrophosphate: fructose-6-phosphate 1-phosphotransferase is involved in the tolerance of Arabidopsis seedlings to salt and osmotic stresses. In Vitro Cellular & Developmental Biology-Plant, 50(1), 84-91.
Bradi1g44460.1	-0.831486	Pyrophosphate--Fructose 6-Phosphate 1-Phosphotrasferase Subunit Beta	Energy and Metabolism	OSMOTIC	Lim, H., Cho, M. H., Bhoo, S. H., & Hahn, T. R. (2014). Pyrophosphate: fructose-6-phosphate 1-phosphotransferase is involved in the tolerance of Arabidopsis seedlings to salt and osmotic stresses. In Vitro Cellular & Developmental Biology-Plant, 50(1), 84-91.
Bradi1g60320.1	-1.585	Sucrose Synthase	Energy and Metabolism	COLD	Crespi, M. D., Zabaleta, E. J., Pontis, H. G., & Salerno, G. L. (1991). Sucrose synthase expression during cold acclimation in wheat. Plant physiology, 96(3), 887-891.
Bradi1g60320.1	-1.585	Sucrose Synthase	Energy and Metabolism	DROUGHT	Du, Y., Zhao, Q., Chen, L., Yao, X., Zhang, H., Wu, J., & Xie, F. (2020). Effect of Drought Stress during Soybean R2–R6 Growth Stages on Sucrose Metabolism in Leaf and Seed. International journal of molecular sciences, 21(2), 618.
Bradi2g05620.1	-0.755512	Malic Enzyme	Energy and Metabolism	COLD	Sun, X., Han, G., Meng, Z., Lin, L., & Sui, N. (2019). Roles of malic enzymes in plant development and stress responses. Plant signaling & behavior, 14(10), e1644596.
Bradi2g05620.1	-0.755512	Malic Enzyme	Energy and Metabolism	SALT	Sun, X., Han, G., Meng, Z., Lin, L., & Sui, N. (2019). Roles of malic enzymes in plant development and stress responses. Plant signaling & behavior, 14(10), e1644596.
Bradi2g05620.1	-0.755512	Malic Enzyme	Energy and Metabolism	DROUGHT	Sun, X., Han, G., Meng, Z., Lin, L., & Sui, N. (2019). Roles of malic enzymes in plant development and stress responses. Plant signaling & behavior, 14(10), e1644596.
Bradi2g48570.1	-0.611085	Malic Enzyme	Energy and Metabolism	COLD	Sun, X., Han, G., Meng, Z., Lin, L., & Sui, N. (2019). Roles of malic enzymes in plant development and stress responses. Plant signaling & behavior, 14(10), e1644596.
Bradi2g48570.1	-0.611085	Malic Enzyme	Energy and Metabolism	SALT	Sun, X., Han, G., Meng, Z., Lin, L., & Sui, N. (2019). Roles of malic enzymes in plant development and stress responses. Plant signaling & behavior, 14(10), e1644596.
Bradi2g48570.1	-0.611085	Malic Enzyme	Energy and Metabolism	DROUGHT	Sun, X., Han, G., Meng, Z., Lin, L., & Sui, N. (2019). Roles of malic enzymes in plant development and stress responses. Plant signaling & behavior, 14(10), e1644596.
Bradi3g22550.2	-0.746243	Enolase	Energy and Metabolism	COLD	Lee, H., Guo, Y., Ohta, M., Xiong, L., Stevenson, B., & Zhu, J. K. (2002). LOS2, a genetic locus required for cold‐responsive gene transcription encodes a bi‐functional enolase. The EMBO journal, 21(11), 2692-2702.
Bradi3g22550.2	-0.746243	Enolase	Energy and Metabolism	SALT	Barkla, B. J., Vera-Estrella, R., Hernández-Coronado, M., & Pantoja, O. (2009). Quantitative proteomics of the tonoplast reveals a role for glycolytic enzymes in salt tolerance. The plant cell, 21(12), 4044-4058.
Bradi3g47910.1	-0.604358	Glucose-6-Phosphate Dehydrogenase	Energy and Metabolism	SALT	Zhao, Y., Cui, Y., Huang, S., Yu, J., Wang, X., Xin, D., ... & Chen, Q. (2020). Genome-Wide Analysis of the Glucose-6-Phosphate Dehydrogenase Family in Soybean and Functional Identification of GmG6PDH2 Involvement in Salt Stress. Frontiers in Plant Science, 11, 214.
Bradi3g47910.1	-0.604358	Glucose-6-Phosphate Dehydrogenase	Energy and Metabolism	OSMOTIC	Zhao, Y., Cui, Y., Huang, S., Yu, J., Wang, X., Xin, D., ... & Chen, Q. (2020). Genome-Wide Analysis of the Glucose-6-Phosphate Dehydrogenase Family in Soybean and Functional Identification of GmG6PDH2 Involvement in Salt Stress. Frontiers in Plant Science, 11, 214.
Bradi3g47910.1	-0.604358	Glucose-6-Phosphate Dehydrogenase	Energy and Metabolism	METAL	Zhao, Y., Cui, Y., Huang, S., Yu, J., Wang, X., Xin, D., ... & Chen, Q. (2020). Genome-Wide Analysis of the Glucose-6-Phosphate Dehydrogenase Family in Soybean and Functional Identification of GmG6PDH2 Involvement in Salt Stress. Frontiers in Plant Science, 11, 214.
Bradi3g47910.1	-0.604358	Glucose-6-Phosphate Dehydrogenase	Energy and Metabolism	OXIDATIVE	Zhao, Y., Cui, Y., Huang, S., Yu, J., Wang, X., Xin, D., ... & Chen, Q. (2020). Genome-Wide Analysis of the Glucose-6-Phosphate Dehydrogenase Family in Soybean and Functional Identification of GmG6PDH2 Involvement in Salt Stress. Frontiers in Plant Science, 11, 214.
Bradi3g49250.2	-1.21812	Phenylalanine Ammonia-Lyase	Energy and Metabolism	PATHOGEN	Cass, C. L., Peraldi, A., Dowd, P. F., Mottiar, Y., Santoro, N., Karlen, S. D., ... & Sedbrook, J. C. (2015). Effects of PHENYLALANINE AMMONIA LYASE (PAL) knockdown on cell wall composition, biomass digestibility, and biotic and abiotic stress responses in Brachypodium. Journal of Experimental Botany, 66(14), 4317-4335.
Bradi1g07170.1	0.674864	Malate Dehydrogenase	Energy and Metabolism	COLD	Wang, Q. J., Sun, H., Dong, Q. L., Sun, T. Y., Jin, Z. X., Hao, Y. J., & Yao, Y. X. (2016). The enhancement of tolerance to salt and cold stresses by modifying the redox state and salicylic acid content via the cytosolic malate dehydrogenase gene in transgenic apple plants. Plant biotechnology journal, 14(10), 1986-1997.
Bradi1g07170.1	0.674864	Malate Dehydrogenase	Energy and Metabolism	SALT	Wang, Q. J., Sun, H., Dong, Q. L., Sun, T. Y., Jin, Z. X., Hao, Y. J., & Yao, Y. X. (2016). The enhancement of tolerance to salt and cold stresses by modifying the redox state and salicylic acid content via the cytosolic malate dehydrogenase gene in transgenic apple plants. Plant biotechnology journal, 14(10), 1986-1997.
Bradi1g64120.1	3.50152	Hexosyltransferase	Energy and Metabolism	DROUGHT	Zheng, Y., Liao, C., Zhao, S., Wang, C., & Guo, Y. (2017). The glycosyltransferase QUA1 regulates chloroplast-associated calcium signaling during salt and drought stress in Arabidopsis. Plant and Cell Physiology, 58(2), 329-341.
Bradi1g64120.1	3.50152	Hexosyltransferase	Energy and Metabolism	SALT	Zheng, Y., Liao, C., Zhao, S., Wang, C., & Guo, Y. (2017). The glycosyltransferase QUA1 regulates chloroplast-associated calcium signaling during salt and drought stress in Arabidopsis. Plant and Cell Physiology, 58(2), 329-341.
Bradi1g64120.1	3.50152	Hexosyltransferase	Energy and Metabolism	HEAT	Georgii, E., Kugler, K., Pfeifer, M., Vanzo, E., Block, K., Domagalska, M. A., ... & Hansel, A. (2019). The systems architecture of molecular memory in poplar after abiotic stress. The Plant Cell, 31(2), 346-367.
Bradi2g55150.1	0.896146	Sedoheptulose-1,7-Bisphosphatase, Chloroplastic-Like	Energy and Metabolism	COLD	Lefebvre, S., Lawson, T., Fryer, M., Zakhleniuk, O. V., Lloyd, J. C., & Raines, C. A. (2005). Increased sedoheptulose-1, 7-bisphosphatase activity in transgenic tobacco plants stimulates photosynthesis and growth from an early stage in development. Plant Physiology, 138(1), 451-460.
Bradi2g55150.1	0.896146	Sedoheptulose-1,7-Bisphosphatase, Chloroplastic-Like	Energy and Metabolism	PATHOGEN	Jones, A. M., Thomas, V., Bennett, M. H., Mansfield, J., & Grant, M. (2006). Modifications to the Arabidopsis defense proteome occur prior to significant transcriptional change in response to inoculation with Pseudomonas syringae. Plant physiology, 142(4), 1603-1620.
Bradi3g13170.1	1.25618	Ferredoxin, Chloroplastic-Like	Energy and Metabolism	LIGHT	Voss, I., Goss, T., Murozuka, E., Altmann, B., McLean, K. J., Rigby, S. E., ... & Hanke, G. T. (2011). FdC1, a novel ferredoxin protein capable of alternative electron partitioning, increases in conditions of acceptor limitation at photosystem I. Journal of Biological Chemistry, 286(1), 50-59.
Bradi3g13170.1	1.25618	Ferredoxin, Chloroplastic-Like	Energy and Metabolism	OXIDATIVE	Rodriguez, R. E., Lodeyro, A., Poli, H. O., Zurbriggen, M., Peisker, M., Palatnik, J. F., ... & Carrillo, N. (2007). Transgenic tobacco plants overexpressing chloroplastic ferredoxin-NADP (H) reductase display normal rates of photosynthesis and increased tolerance to oxidative stress. Plant physiology, 143(2), 639-649.
Bradi4g08030.1	0.733337	Chloroplast Stem-Loop Binding Protein Of 41 kDa	Energy and Metabolism	DROUGHT	Raab, S., Toth, Z., de Groot, C., Stamminger, T., & Hoth, S. (2006). ABA-responsive RNA-binding proteins are involved in chloroplast and stromule function in Arabidopsis seedlings. Planta, 224(4), 900-914.
Bradi4g08030.1	0.733337	Chloroplast Stem-Loop Binding Protein Of 41 kDa	Energy and Metabolism	PATHOGEN	Jones, A. M., Thomas, V., Bennett, M. H., Mansfield, J., & Grant, M. (2006). Modifications to the Arabidopsis defense proteome occur prior to significant transcriptional change in response to inoculation with Pseudomonas syringae. Plant physiology, 142(4), 1603-1620.
Bradi4g08030.1	0.733337	Chloroplast Stem-Loop Binding Protein Of 41 kDa	Energy and Metabolism	COLD	Goulas, E., Schubert, M., Kieselbach, T., Kleczkowski, L. A., Gardeström, P., Schröder, W., & Hurry, V. (2006). The chloroplast lumen and stromal proteomes of Arabidopsis thaliana show differential sensitivity to short‐and long‐term exposure to low temperature. The Plant Journal, 47(5), 720-734.
Bradi4g08030.1	0.733337	Chloroplast Stem-Loop Binding Protein Of 41 kDa	Energy and Metabolism	WOUNDING	Raab, S., Toth, Z., de Groot, C., Stamminger, T., & Hoth, S. (2006). ABA-responsive RNA-binding proteins are involved in chloroplast and stromule function in Arabidopsis seedlings. Planta, 224(4), 900-914.
Bradi4g24367.1	0.736713	Fructose-Bisphosphate Aldolase, Chloroplastic-Like	Energy and Metabolism	METAL	Sarry, J. E., Kuhn, L., Ducruix, C., Lafaye, A., Junot, C., Hugouvieux, V., ... & Amekraz, B. (2006). The early responses of Arabidopsis thaliana cells to cadmium exposure explored by protein and metabolite profiling analyses. Proteomics, 6(7), 2180-2198.
Bradi3g53260.1	-1.3859	Pyrophosphate--Fructose 6-Phosphate 1-Phosphotrasferase Subunit Alpha	Energy and Metabolism	ANOXIA	Huang, S., Colmer, T. D., & Millar, A. H. (2008). Does anoxia tolerance involve altering the energy currency towards PPi?. Trends in plant science, 13(5), 221-227.
Bradi3g53260.1	-1.3859	Pyrophosphate--Fructose 6-Phosphate 1-Phosphotrasferase Subunit Alpha	Energy and Metabolism	SALT	Lim, H., Cho, M. H., Bhoo, S. H., & Hahn, T. R. (2014). Pyrophosphate: fructose-6-phosphate 1-phosphotransferase is involved in the tolerance of Arabidopsis seedlings to salt and osmotic stresses. In Vitro Cellular & Developmental Biology-Plant, 50(1), 84-91.
Bradi3g53260.1	-1.3859	Pyrophosphate--Fructose 6-Phosphate 1-Phosphotrasferase Subunit Alpha	Energy and Metabolism	DROUGHT	Lim, H., Cho, M. H., Bhoo, S. H., & Hahn, T. R. (2014). Pyrophosphate: fructose-6-phosphate 1-phosphotransferase is involved in the tolerance of Arabidopsis seedlings to salt and osmotic stresses. In Vitro Cellular & Developmental Biology-Plant, 50(1), 84-91.
Bradi3g53260.1	-1.3859	Pyrophosphate--Fructose 6-Phosphate 1-Phosphotrasferase Subunit Alpha	Energy and Metabolism	WOUNDING	Lim, H., Cho, M. H., Bhoo, S. H., & Hahn, T. R. (2014). Pyrophosphate: fructose-6-phosphate 1-phosphotransferase is involved in the tolerance of Arabidopsis seedlings to salt and osmotic stresses. In Vitro Cellular & Developmental Biology-Plant, 50(1), 84-91.
Bradi3g53260.1	-1.3859	Pyrophosphate--Fructose 6-Phosphate 1-Phosphotrasferase Subunit Alpha	Energy and Metabolism	OSMOTIC	Lim, H., Cho, M. H., Bhoo, S. H., & Hahn, T. R. (2014). Pyrophosphate: fructose-6-phosphate 1-phosphotransferase is involved in the tolerance of Arabidopsis seedlings to salt and osmotic stresses. In Vitro Cellular & Developmental Biology-Plant, 50(1), 84-91.
Bradi4g31310.1	-0.628985	Aldehyde Dehydrogenase Family 7 Member A1	Energy and Metabolism	ABA	Kirch, H. H., Schlingensiepen, S., Kotchoni, S., Sunkar, R., & Bartels, D. (2005). Detailed expression analysis of selected genes of the aldehyde dehydrogenase (ALDH) gene superfamily in Arabidopsis thaliana. Plant molecular biology, 57(3), 315-332.
Bradi4g31310.1	-0.628985	Aldehyde Dehydrogenase Family 7 Member A1	Energy and Metabolism	DROUGHT	Rodrigues, S. M., Andrade, M. O., Gomes, A. P. S., DaMatta, F. M., Baracat-Pereira, M. C., & Fontes, E. P. (2006). Arabidopsis and tobacco plants ectopically expressing the soybean antiquitin-like ALDH7 gene display enhanced tolerance to drought, salinity, and oxidative stress. Journal of experimental botany, 57(9), 1909-1918.
Bradi4g31310.1	-0.628985	Aldehyde Dehydrogenase Family 7 Member A1	Energy and Metabolism	HEAT	Shin, J. H., Kim, S. R., & An, G. (2009). Rice aldehyde dehydrogenase7 is needed for seed maturation and viability. Plant physiology, 149(2), 905-915.
Bradi4g31310.1	-0.628985	Aldehyde Dehydrogenase Family 7 Member A1	Energy and Metabolism	OXIDATIVE	Shin, J. H., Kim, S. R., & An, G. (2009). Rice aldehyde dehydrogenase7 is needed for seed maturation and viability. Plant physiology, 149(2), 905-915.
Bradi4g31310.1	-0.628985	Aldehyde Dehydrogenase Family 7 Member A1	Energy and Metabolism	SALT	Rodrigues, S. M., Andrade, M. O., Gomes, A. P. S., DaMatta, F. M., Baracat-Pereira, M. C., & Fontes, E. P. (2006). Arabidopsis and tobacco plants ectopically expressing the soybean antiquitin-like ALDH7 gene display enhanced tolerance to drought, salinity, and oxidative stress. Journal of experimental botany, 57(9), 1909-1918.
Bradi2g04070.1	1.75932	Probable Staphylococcal-Like Nuclease Can1	Growth/Development	PATHOGEN	Sakamoto, W., & Takami, T. (2014). Nucleases in higher plants and their possible involvement in DNA degradation during leaf senescence. Journal of experimental botany, 65(14), 3835-3843.
Bradi2g09760.1	3.60478	Phosphatidylinositol Transfer Protein 3	Intracellular Traffic	OSMOTIC	Kearns, M. A., Monks, D. E., Fang, M., Rivas, M. P., Courtney, P. D., Chen, J., ... & Bankaitis, V. A. (1998). Novel developmentally regulated phosphoinositide binding proteins from soybean whose expression bypasses the requirement for an essential phosphatidylinositol transfer protein in yeast. The EMBO Journal, 17(14), 4004-4017.
Bradi2g27267.1	0.753066	Protein Bonzai 3-Like Isoform 1	Intracellular Traffic	COLD	Hua, J., Grisafi, P., Cheng, S. H., & Fink, G. R. (2001). Plant growth homeostasis is controlled by the Arabidopsis BON1 and BAP1 genes. Genes & Development, 15(17), 2263-2272.
Bradi2g27267.1	0.753066	Protein Bonzai 3-Like Isoform 1	Intracellular Traffic	OSMOTIC	Chen, K., Gao, J., Sun, S., Zhang, Z., Yu, B., Li, J., ... & Hua, J. The Calcium-Responsive Phospholipid-Binding BONZAI Proteins Control Global Osmotic Stress Responses in Plants Through Repression of Immune Signaling. CURRENT-BIOLOGY-D-20-00546.
Bradi1g32770.1	4.34922	97 kDa Heat Shock Protein-Like (Low Quality Protein)	Protein Destination And Storage	METAL	Hasan, M., Cheng, Y., Kanwar, M. K., Chu, X. Y., Ahammed, G. J., & Qi, Z. Y. (2017). Responses of plant proteins to heavy metal stress—a review. Frontiers in plant science, 8, 1492.
Bradi1g32770.1	4.34922	97 kDa Heat Shock Protein-Like (Low Quality Protein)	Protein Destination And Storage	PATHOGEN	Gou, M., Zhang, Z., Zhang, N., Huang, Q., Monaghan, J., Yang, H., ... & Hua, J. (2015). Opposing effects on two phases of defense responses from concerted actions of HEAT SHOCK COGNATE70 and BONZAI1 in Arabidopsis. Plant Physiology, 169(3), 2304-2323.
Bradi1g32770.1	4.34922	97 kDa Heat Shock Protein-Like (Low Quality Protein)	Protein Destination And Storage	COLD	Bae, M. S., Cho, E. J., Choi, E. Y., & Park, O. K. (2003). Analysis of the Arabidopsis nuclear proteome and its response to cold stress. The Plant Journal, 36(5), 652-663.
Bradi1g32770.1	4.34922	97 kDa Heat Shock Protein-Like (Low Quality Protein)	Protein Destination And Storage	HEAT	Noël, L. D., Cagna, G., Stuttmann, J., Wirthmüller, L., Betsuyaku, S., Witte, C. P., ... & Parker, J. E. (2007). Interaction between SGT1 and cytosolic/nuclear HSC70 chaperones regulates Arabidopsis immune responses. The Plant Cell, 19(12), 4061-4076.
Bradi1g50180.1	2.56885	Dolichyl-Diphosphooligosaccharide--Protein Glycosyltransferase Subunit Dad1	Protein Destination And Storage	LIGHT	Beaugelin, I., Chevalier, A., D’alessandro, S., Ksas, B., Novák, O., Strnad, M., ... & Monnet, F. (2019). OXI1 and DAD regulate light-induced cell death antagonistically through jasmonate and salicylate levels. Plant physiology, 180(3), 1691-1708.
Bradi1g50180.1	2.56885	Dolichyl-Diphosphooligosaccharide--Protein Glycosyltransferase Subunit Dad1	Protein Destination And Storage	PATHOGEN	Yan, Q., Si, J., Cui, X., Peng, H., Jing, M., Chen, X., ... & Dou, D. (2019). GmDAD1, a conserved Defender Against Cell Death 1 (DAD1) from soybean, positively regulates plant resistance against Phytophthora pathogens. Frontiers in plant science, 10, 107.
Bradi1g66590.1	0.87054	Heat Shock Cognate 70 kDa Protein-Like	Protein Destination And Storage	METAL	Hasan, M., Cheng, Y., Kanwar, M. K., Chu, X. Y., Ahammed, G. J., & Qi, Z. Y. (2017). Responses of plant proteins to heavy metal stress—a review. Frontiers in plant science, 8, 1492.
Bradi1g66590.1	0.87054	Heat Shock Cognate 70 kDa Protein-Like	Protein Destination And Storage	PATHOGEN	Gou, M., Zhang, Z., Zhang, N., Huang, Q., Monaghan, J., Yang, H., ... & Hua, J. (2015). Opposing effects on two phases of defense responses from concerted actions of HEAT SHOCK COGNATE70 and BONZAI1 in Arabidopsis. Plant Physiology, 169(3), 2304-2323.
Bradi1g66590.1	0.87054	Heat Shock Cognate 70 kDa Protein-Like	Protein Destination And Storage	COLD	Bae, M. S., Cho, E. J., Choi, E. Y., & Park, O. K. (2003). Analysis of the Arabidopsis nuclear proteome and its response to cold stress. The Plant Journal, 36(5), 652-663.
Bradi1g66590.1	0.87054	Heat Shock Cognate 70 kDa Protein-Like	Protein Destination And Storage	HEAT	Noël, L. D., Cagna, G., Stuttmann, J., Wirthmüller, L., Betsuyaku, S., Witte, C. P., ... & Parker, J. E. (2007). Interaction between SGT1 and cytosolic/nuclear HSC70 chaperones regulates Arabidopsis immune responses. The Plant Cell, 19(12), 4061-4076.
Bradi3g49730.1	0.614753	Endosomal Targeting Bro1-Like Domain-Containing Protein	Protein Destination And Storage	DROUGHT	Wang, X., Xu, M., Gao, C., Zeng, Y., Cui, Y., Shen, W., & Jiang, L. (2020). The roles of endomembrane trafficking in plant abiotic stress responses. Journal of Integrative Plant Biology, 62(1), 55-69.
Bradi1g34750.1	-0.636777	Peptidyl-Prolyl Cis-Trans Isomerase	Protein Destination And Storage	PATHOGEN	Mokryakova, M. V., Pogorelko, G. V., Bruskin, S. A., Piruzian, E. S., & Abdeeva, I. A. (2014). The role of peptidyl-prolyl cis/trans isomerase genes of Arabidopsis thaliana in plant defense during the course of Xanthomonas campestris infection. Russian journal of genetics, 50(2), 140-148.
Bradi3g47690.1	0.836639	Elongation Factor Tu, Chloroplastic-Like	Protein Synthesis	HEAT	Li, X., Cai, C., Wang, Z., Fan, B., Zhu, C., & Chen, Z. (2018). Plastid translation elongation factor tu is prone to heat-induced aggregation despite its critical role in plant heat tolerance. Plant Physiology, 176(4), 3027-3045.
Bradi1g36700.1	-0.747061	Alba Domain-Containing Protein-Like	Protein Synthesis	SALT	Verma, J. K., Wardhan, V., Singh, D., Chakraborty, S., & Chakraborty, N. (2018). Genome-wide identification of the Alba gene family in plants and stress-responsive expression of the rice Alba genes. Genes, 9(4), 183.
Bradi1g36700.1	-0.747061	Alba Domain-Containing Protein-Like	Protein Synthesis	HEAT	Verma, J. K., Wardhan, V., Singh, D., Chakraborty, S., & Chakraborty, N. (2018). Genome-wide identification of the Alba gene family in plants and stress-responsive expression of the rice Alba genes. Genes, 9(4), 183.
Bradi1g36700.1	-0.747061	Alba Domain-Containing Protein-Like	Protein Synthesis	COLD	Verma, J. K., Wardhan, V., Singh, D., Chakraborty, S., & Chakraborty, N. (2018). Genome-wide identification of the Alba gene family in plants and stress-responsive expression of the rice Alba genes. Genes, 9(4), 183.
Bradi1g72320.1	0.86711	Dihydroflavonol-4-Reductase-Like	Secondary Metabolism	OXIDATIVE	Wang, H., Fan, W., Li, H., Yang, J., Huang, J., & Zhang, P. (2013). Functional characterization of dihydroflavonol-4-reductase in anthocyanin biosynthesis of purple sweet potato underlies the direct evidence of anthocyanins function against abiotic stresses. PloS one, 8(11), e78484.
Bradi1g72320.1	0.86711	Dihydroflavonol-4-Reductase-Like	Secondary Metabolism	COLD	Wang, H., Fan, W., Li, H., Yang, J., Huang, J., & Zhang, P. (2013). Functional characterization of dihydroflavonol-4-reductase in anthocyanin biosynthesis of purple sweet potato underlies the direct evidence of anthocyanins function against abiotic stresses. PloS one, 8(11), e78484.
Bradi1g21310.1	0.682696	Serine/Threonine-Protein Kinase Sapk2-Like Isoform 2	Signal Transduction	ABA	Kim, H., Hwang, H., Hong, J. W., Lee, Y. N., Ahn, I. P., Yoon, I. S., ... & Kim, B. G. (2012). A rice orthologue of the ABA receptor, OsPYL/RCAR5, is a positive regulator of the ABA signal transduction pathway in seed germination and early seedling growth. Journal of experimental botany, 63(2), 1013-1024.
Bradi1g21310.1	0.682696	Serine/Threonine-Protein Kinase Sapk2-Like Isoform 2	Signal Transduction	DROUGHT	Tang, N., Zhang, H., Li, X., Xiao, J., & Xiong, L. (2012). Constitutive activation of transcription factor OsbZIP46 improves drought tolerance in rice. Plant physiology, 158(4), 1755-1768.
Bradi1g21310.1	0.682696	Serine/Threonine-Protein Kinase Sapk2-Like Isoform 2	Signal Transduction	OSMOTIC	Kobayashi, Y., Yamamoto, S., Minami, H., Kagaya, Y., & Hattori, T. (2004). Differential activation of the rice sucrose nonfermenting1–related protein kinase2 family by hyperosmotic stress and abscisic acid. The Plant Cell, 16(5), 1163-1177.
Bradi4g36137.1	0.950974	Probable Serine/Threonine-Protein Kinase Pbl19	Signal Transduction	DROUGHT	Zhao, X., Bai, S., Li, L., Han, X., Li, J., Zhu, Y., ... & Li, S. (2020). Comparative Transcriptome Analysis of Two Aegilops tauschii with Contrasting Drought Tolerance by RNA-Seq. International Journal of Molecular Sciences, 21(10), 3595.
Bradi4g36137.1	0.950974	Probable Serine/Threonine-Protein Kinase Pbl19	Signal Transduction	PATHOGEN	Gong, B. Q., Wang, F. Z., & Li, J. F. (2020). Hide-and-seek: chitin-triggered plant immunity and fungal counterstrategies. Trends in Plant Science.
Bradi5g19680.1	3.0709	Receptor-Like Protein Kinase Feronia-Like	Signal Transduction	PATHOGEN	Kessler, S. A., Shimosato-Asano, H., Keinath, N. F., Wuest, S. E., Ingram, G., Panstruga, R., & Grossniklaus, U. (2010). Conserved molecular components for pollen tube reception and fungal invasion. Science, 330(6006), 968-971.
Bradi5g19680.1	3.0709	Receptor-Like Protein Kinase Feronia-Like	Signal Transduction	SALT	Feng, W., Kita, D., Peaucelle, A., Cartwright, H. N., Doan, V., Duan, Q., ... & Yvon, R. (2018). The FERONIA receptor kinase maintains cell-wall integrity during salt stress through Ca2+ signaling. Current Biology, 28(5), 666-675.
Bradi5g19680.1	3.0709	Receptor-Like Protein Kinase Feronia-Like	Signal Transduction	ABA	Yu, F., Qian, L., Nibau, C., Duan, Q., Kita, D., Levasseur, K., ... & Li, L. (2012). FERONIA receptor kinase pathway suppresses abscisic acid signaling in Arabidopsis by activating ABI2 phosphatase. Proceedings of the National Academy of Sciences, 109(36), 14693-14698.
Bradi4g23450.1	-1.64151	Probable Nad Kinase 2, Chloroplastic	Signal Transduction	HEAT	Chai, M. F., Chen, Q. J., An, R., Chen, Y. M., Chen, J., & Wang, X. C. (2005). NADK2, an Arabidopsis chloroplastic NAD kinase, plays a vital role in both chlorophyll synthesis and chloroplast protection. Plant molecular biology, 59(4), 553-564.
Bradi4g23450.1	-1.64151	Probable Nad Kinase 2, Chloroplastic	Signal Transduction	OXIDATIVE	Chai, M. F., Chen, Q. J., An, R., Chen, Y. M., Chen, J., & Wang, X. C. (2005). NADK2, an Arabidopsis chloroplastic NAD kinase, plays a vital role in both chlorophyll synthesis and chloroplast protection. Plant molecular biology, 59(4), 553-564.
Bradi4g23450.1	-1.64151	Probable Nad Kinase 2, Chloroplastic	Signal Transduction	UV	Chai, M. F., Chen, Q. J., An, R., Chen, Y. M., Chen, J., & Wang, X. C. (2005). NADK2, an Arabidopsis chloroplastic NAD kinase, plays a vital role in both chlorophyll synthesis and chloroplast protection. Plant molecular biology, 59(4), 553-564.
Bradi4g23450.1	-1.64151	Probable Nad Kinase 2, Chloroplastic	Signal Transduction	DROUGHT	Chai, M. F., Chen, Q. J., An, R., Chen, Y. M., Chen, J., & Wang, X. C. (2005). NADK2, an Arabidopsis chloroplastic NAD kinase, plays a vital role in both chlorophyll synthesis and chloroplast protection. Plant molecular biology, 59(4), 553-564.
Bradi4g23450.1	-1.64151	Probable Nad Kinase 2, Chloroplastic	Signal Transduction	SALT	Chai, M. F., Chen, Q. J., An, R., Chen, Y. M., Chen, J., & Wang, X. C. (2005). NADK2, an Arabidopsis chloroplastic NAD kinase, plays a vital role in both chlorophyll synthesis and chloroplast protection. Plant molecular biology, 59(4), 553-564.
Bradi5g23940.1	-0.793372	Glycerol Kinase	Signal Transduction	OSMOTIC	Eastmond, P. J. (2004). Glycerol‐insensitive Arabidopsis mutants: gli1 seedlings lack glycerol kinase, accumulate glycerol and are more resistant to abiotic stress. The Plant Journal, 37(4), 617-625.
Bradi5g23940.1	-0.793372	Glycerol Kinase	Signal Transduction	OXIDATIVE	Eastmond, P. J. (2004). Glycerol‐insensitive Arabidopsis mutants: gli1 seedlings lack glycerol kinase, accumulate glycerol and are more resistant to abiotic stress. The Plant Journal, 37(4), 617-625.
Bradi5g23940.1	-0.793372	Glycerol Kinase	Signal Transduction	COLD	Eastmond, P. J. (2004). Glycerol‐insensitive Arabidopsis mutants: gli1 seedlings lack glycerol kinase, accumulate glycerol and are more resistant to abiotic stress. The Plant Journal, 37(4), 617-625.
Bradi5g23940.1	-0.793372	Glycerol Kinase	Signal Transduction	SALT	Eastmond, P. J. (2004). Glycerol‐insensitive Arabidopsis mutants: gli1 seedlings lack glycerol kinase, accumulate glycerol and are more resistant to abiotic stress. The Plant Journal, 37(4), 617-625.
Bradi5g23940.1	-0.793372	Glycerol Kinase	Signal Transduction	DROUGHT	Eastmond, P. J. (2004). Glycerol‐insensitive Arabidopsis mutants: gli1 seedlings lack glycerol kinase, accumulate glycerol and are more resistant to abiotic stress. The Plant Journal, 37(4), 617-625.
Bradi5g26140.1	-0.637408	Pyruvate Kinase	Signal Transduction	COLD	Wulfert, S., Schilasky, S., & Krueger, S. (2020). Transcriptional and Biochemical Characterization of Cytosolic Pyruvate Kinases in Arabidopsis thaliana. Plants, 9(3), 353.
Bradi1g67960.1	-0.823149	V-Type ATPase	Transport	SALT	Dietz, K. J., Tavakoli, N., Kluge, C., Mimura, T., Sharma, S. S., Harris, G. C., ... & Golldack, D. (2001). Significance of the V‐type ATPase for the adaptation to stressful growth conditions and its regulation on the molecular and biochemical level. Journal of experimental botany, 52(363), 1969-1980.
Bradi1g67960.1	-0.823149	V-Type ATPase	Transport	DROUGHT	Dietz, K. J., Tavakoli, N., Kluge, C., Mimura, T., Sharma, S. S., Harris, G. C., ... & Golldack, D. (2001). Significance of the V‐type ATPase for the adaptation to stressful growth conditions and its regulation on the molecular and biochemical level. Journal of experimental botany, 52(363), 1969-1980.
Bradi1g67960.1	-0.823149	V-Type ATPase	Transport	COLD	Dietz, K. J., Tavakoli, N., Kluge, C., Mimura, T., Sharma, S. S., Harris, G. C., ... & Golldack, D. (2001). Significance of the V‐type ATPase for the adaptation to stressful growth conditions and its regulation on the molecular and biochemical level. Journal of experimental botany, 52(363), 1969-1980.
Bradi1g67960.1	-0.823149	V-Type ATPase	Transport	METAL	Dietz, K. J., Tavakoli, N., Kluge, C., Mimura, T., Sharma, S. S., Harris, G. C., ... & Golldack, D. (2001). Significance of the V‐type ATPase for the adaptation to stressful growth conditions and its regulation on the molecular and biochemical level. Journal of experimental botany, 52(363), 1969-1980.
Bradi1g67960.1	-0.823149	V-Type ATPase	Transport	ACID	Dietz, K. J., Tavakoli, N., Kluge, C., Mimura, T., Sharma, S. S., Harris, G. C., ... & Golldack, D. (2001). Significance of the V‐type ATPase for the adaptation to stressful growth conditions and its regulation on the molecular and biochemical level. Journal of experimental botany, 52(363), 1969-1980.
Bradi1g67960.1	-0.823149	V-Type ATPase	Transport	ANOXIA	Dietz, K. J., Tavakoli, N., Kluge, C., Mimura, T., Sharma, S. S., Harris, G. C., ... & Golldack, D. (2001). Significance of the V‐type ATPase for the adaptation to stressful growth conditions and its regulation on the molecular and biochemical level. Journal of experimental botany, 52(363), 1969-1980.
Bradi2g39610.1	-0.673987	V-Type Proton ATPase Subunit F	Transport	SALT	Dietz, K. J., Tavakoli, N., Kluge, C., Mimura, T., Sharma, S. S., Harris, G. C., ... & Golldack, D. (2001). Significance of the V‐type ATPase for the adaptation to stressful growth conditions and its regulation on the molecular and biochemical level. Journal of experimental botany, 52(363), 1969-1980.
Bradi2g39610.1	-0.673987	V-Type Proton ATPase Subunit F	Transport	DROUGHT	Dietz, K. J., Tavakoli, N., Kluge, C., Mimura, T., Sharma, S. S., Harris, G. C., ... & Golldack, D. (2001). Significance of the V‐type ATPase for the adaptation to stressful growth conditions and its regulation on the molecular and biochemical level. Journal of experimental botany, 52(363), 1969-1980.
Bradi2g39610.1	-0.673987	V-Type Proton ATPase Subunit F	Transport	COLD	Dietz, K. J., Tavakoli, N., Kluge, C., Mimura, T., Sharma, S. S., Harris, G. C., ... & Golldack, D. (2001). Significance of the V‐type ATPase for the adaptation to stressful growth conditions and its regulation on the molecular and biochemical level. Journal of experimental botany, 52(363), 1969-1980.
Bradi2g39610.1	-0.673987	V-Type Proton ATPase Subunit F	Transport	METAL	Dietz, K. J., Tavakoli, N., Kluge, C., Mimura, T., Sharma, S. S., Harris, G. C., ... & Golldack, D. (2001). Significance of the V‐type ATPase for the adaptation to stressful growth conditions and its regulation on the molecular and biochemical level. Journal of experimental botany, 52(363), 1969-1980.
Bradi2g39610.1	-0.673987	V-Type Proton ATPase Subunit F	Transport	ACID	Dietz, K. J., Tavakoli, N., Kluge, C., Mimura, T., Sharma, S. S., Harris, G. C., ... & Golldack, D. (2001). Significance of the V‐type ATPase for the adaptation to stressful growth conditions and its regulation on the molecular and biochemical level. Journal of experimental botany, 52(363), 1969-1980.
Bradi2g39610.1	-0.673987	V-Type Proton ATPase Subunit F	Transport	ANOXIA	Dietz, K. J., Tavakoli, N., Kluge, C., Mimura, T., Sharma, S. S., Harris, G. C., ... & Golldack, D. (2001). Significance of the V‐type ATPase for the adaptation to stressful growth conditions and its regulation on the molecular and biochemical level. Journal of experimental botany, 52(363), 1969-1980.
Bradi2g24850.1	1.90754	Bidirectional Sugar Transporter Sweet1B-Like	Transporter	COLD	Le Hir, R., Spinner, L., Klemens, P. A., Chakraborti, D., de Marco, F., Vilaine, F., ... & Téoulé, E. (2015). Disruption of the sugar transporters AtSWEET11 and AtSWEET12 affects vascular development and freezing tolerance in Arabidopsis. Molecular Plant, 8(11), 1687-1690.
Bradi2g37630.1	2.24792	Abc Transporter G Family Member 1-Like	Transporter	PATHOGEN	Hammes, U. Z., Schachtman, D. P., Berg, R. H., Nielsen, E., Koch, W., McIntyre, L. M., & Taylor, C. G. (2005). Nematode-induced changes of transporter gene expression in Arabidopsis roots. Molecular Plant-Microbe Interactions, 18(12), 1247-1257.
Bradi3g47010.1	1.67595	Nitrate Transporter 1.3-Like	Transporter	POLYAMINE	Tong, W., Imai, A., Tabata, R., Shigenobu, S., Yamaguchi, K., Yamada, M., ... & Takahashi, T. (2016). Polyamine resistance is increased by mutations in a nitrate transporter gene NRT1. 3 (AtNPF6. 4) in Arabidopsis thaliana. Frontiers in plant science, 7, 834.
Bradi5g17230.1	2.12206	Metal-Nicotianamine Transporter Ysl16-Like	Transporter	OXIDATIVE	Zheng, L., Yamaji, N., Yokosho, K., & Ma, J. F. (2012). YSL16 is a phloem-localized transporter of the copper-nicotianamine complex that is responsible for copper distribution in rice. The Plant Cell, 24(9), 3767-3782.
Bradi1g46670.1	-0.903109	Sucrose Synthase	Transporter	COLD	Crespi, M. D., Zabaleta, E. J., Pontis, H. G., & Salerno, G. L. (1991). Sucrose synthase expression during cold acclimation in wheat. Plant physiology, 96(3), 887-891.
Bradi1g46670.1	-0.903109	Sucrose Synthase	Transporter	DROUGHT	Du, Y., Zhao, Q., Chen, L., Yao, X., Zhang, H., Wu, J., & Xie, F. (2020). Effect of Drought Stress during Soybean R2–R6 Growth Stages on Sucrose Metabolism in Leaf and Seed. International journal of molecular sciences, 21(2), 618.
Bradi1g48010.1	-0.91958	AAA+ ATPase	Transporter	COLD	Baek, K., Seo, P. J., & Park, C. M. (2011). Activation of a mitochondrial ATPase gene induces abnormal seed development in Arabidopsis. Molecules and cells, 31(4), 361-369.
Bradi1g48010.1	-0.91958	AAA+ ATPase	Transporter	DROUGHT	Baek, K., Seo, P. J., & Park, C. M. (2011). Activation of a mitochondrial ATPase gene induces abnormal seed development in Arabidopsis. Molecules and cells, 31(4), 361-369.
Bradi1g48010.1	-0.91958	AAA+ ATPase	Transporter	SALT	Baek, K., Seo, P. J., & Park, C. M. (2011). Activation of a mitochondrial ATPase gene induces abnormal seed development in Arabidopsis. Molecules and cells, 31(4), 361-369.
Bradi1g59420.1	-0.835793	Sugar Transport Protein Mst3	Transporter	SALT	Feng, Y., Chen, X., He, Y., Kou, X., & Xue, Z. (2019). Effects of Exogenous Trehalose on the Metabolism of Sugar and Abscisic Acid in Tomato Seedlings Under Salt Stress. Transactions of Tianjin University, 25(5), 451-471.
Bradi1g59420.1	-0.835793	Sugar Transport Protein Mst3	Transporter	COLD	Feng, Y., Chen, X., He, Y., Kou, X., & Xue, Z. (2019). Effects of Exogenous Trehalose on the Metabolism of Sugar and Abscisic Acid in Tomato Seedlings Under Salt Stress. Transactions of Tianjin University, 25(5), 451-471.
Bradi4g31330.1	-0.81069	Copper Transporter 5.1	Transporter	OXIDATIVE	Carrió-Seguí, A., Garcia-Molina, A., Sanz, A., & Penarrubia, L. (2015). Defective copper transport in the copt5 mutant affects cadmium tolerance. Plant and Cell Physiology, 56(3), 442-454.
Bradi5g22077.1	-2.96651	Abc Transporter C Family Member 2-Like	Transporter	DROUGHT	Jarzyniak, K. M., & Jasiński, M. (2014). Membrane transporters and drought resistance–a complex issue. Frontiers in plant science, 5, 687.
Bradi1g54030.1	0.589136	Chloroplast Stem-Loop Binding Protein Of 41 kDa	Unclassified	DROUGHT	Raab, S., Toth, Z., de Groot, C., Stamminger, T., & Hoth, S. (2006). ABA-responsive RNA-binding proteins are involved in chloroplast and stromule function in Arabidopsis seedlings. Planta, 224(4), 900-914.
Bradi1g54030.1	0.589136	Chloroplast Stem-Loop Binding Protein Of 41 kDa	Unclassified	PATHOGEN	Jones, A. M., Thomas, V., Bennett, M. H., Mansfield, J., & Grant, M. (2006). Modifications to the Arabidopsis defense proteome occur prior to significant transcriptional change in response to inoculation with Pseudomonas syringae. Plant physiology, 142(4), 1603-1620.
Bradi1g54030.1	0.589136	Chloroplast Stem-Loop Binding Protein Of 41 kDa	Unclassified	COLD	Goulas, E., Schubert, M., Kieselbach, T., Kleczkowski, L. A., Gardeström, P., Schröder, W., & Hurry, V. (2006). The chloroplast lumen and stromal proteomes of Arabidopsis thaliana show differential sensitivity to short‐and long‐term exposure to low temperature. The Plant Journal, 47(5), 720-734.
Bradi1g54030.1	0.589136	Chloroplast Stem-Loop Binding Protein Of 41 kDa	Unclassified	WOUNDING	Raab, S., Toth, Z., de Groot, C., Stamminger, T., & Hoth, S. (2006). ABA-responsive RNA-binding proteins are involved in chloroplast and stromule function in Arabidopsis seedlings. Planta, 224(4), 900-914.
Bradi2g55070.1	1.19256	Heme-Binding-Like Protein At3G10130, Chloroplastic-Like	Unclassified	OXIDATIVE	Shanmugabalaji, V., Grimm, B., & Kessler, F. (2020). Characterization of a plastoglobule-localized SOUL4 heme-binding protein in Arabidopsis thaliana. Frontiers in plant science, 11, 2.
Bradi4g41527.1	1.92747	CBS Domain-Containing Protein CBSCBSpb3-Like	Unclassified	COLD	Kushwaha, H. R., Singh, A. K., Sopory, S. K., Singla-Pareek, S. L., & Pareek, A. (2009). Genome wide expression analysis of CBS domain containing proteins in Arabidopsis thaliana (L.) Heynh and Oryza sativa L. reveals their developmental and stress regulation. BMC genomics, 10(1), 200.
Bradi4g41527.1	1.92747	CBS Domain-Containing Protein CBSCBSpb3-Like	Unclassified	LIGHT	Kushwaha, H. R., Singh, A. K., Sopory, S. K., Singla-Pareek, S. L., & Pareek, A. (2009). Genome wide expression analysis of CBS domain containing proteins in Arabidopsis thaliana (L.) Heynh and Oryza sativa L. reveals their developmental and stress regulation. BMC genomics, 10(1), 200.
Bradi4g41527.1	1.92747	CBS Domain-Containing Protein CBSCBSpb3-Like	Unclassified	WOUNDING	Kushwaha, H. R., Singh, A. K., Sopory, S. K., Singla-Pareek, S. L., & Pareek, A. (2009). Genome wide expression analysis of CBS domain containing proteins in Arabidopsis thaliana (L.) Heynh and Oryza sativa L. reveals their developmental and stress regulation. BMC genomics, 10(1), 200.
Bradi4g41527.1	1.92747	CBS Domain-Containing Protein CBSCBSpb3-Like	Unclassified	DROUGHT	Kushwaha, H. R., Singh, A. K., Sopory, S. K., Singla-Pareek, S. L., & Pareek, A. (2009). Genome wide expression analysis of CBS domain containing proteins in Arabidopsis thaliana (L.) Heynh and Oryza sativa L. reveals their developmental and stress regulation. BMC genomics, 10(1), 200.
Bradi4g41527.1	1.92747	CBS Domain-Containing Protein CBSCBSpb3-Like	Unclassified	OSMOTIC	Kushwaha, H. R., Singh, A. K., Sopory, S. K., Singla-Pareek, S. L., & Pareek, A. (2009). Genome wide expression analysis of CBS domain containing proteins in Arabidopsis thaliana (L.) Heynh and Oryza sativa L. reveals their developmental and stress regulation. BMC genomics, 10(1), 200.
Bradi4g41527.1	1.92747	CBS Domain-Containing Protein CBSCBSpb3-Like	Unclassified	SALT	Kushwaha, H. R., Singh, A. K., Sopory, S. K., Singla-Pareek, S. L., & Pareek, A. (2009). Genome wide expression analysis of CBS domain containing proteins in Arabidopsis thaliana (L.) Heynh and Oryza sativa L. reveals their developmental and stress regulation. BMC genomics, 10(1), 200.
Bradi4g41527.1	1.92747	CBS Domain-Containing Protein CBSCBSpb3-Like	Unclassified	OXIDATIVE	Kushwaha, H. R., Singh, A. K., Sopory, S. K., Singla-Pareek, S. L., & Pareek, A. (2009). Genome wide expression analysis of CBS domain containing proteins in Arabidopsis thaliana (L.) Heynh and Oryza sativa L. reveals their developmental and stress regulation. BMC genomics, 10(1), 200.
